# Supplementary material for: The Bos taurus maternal microbiome: Role in determining the progeny early-life upper respiratory tract microbiome and health
Source: PLoS One. 2019 Mar 6;14(3):e0208014. doi: 10.1371/journal.pone.0208014 (PMC6402649; doi:10.1371/journal.pone.0208014)
Supplement: S2 File — (XLSX) [file pone.0208014.s002.xlsx]

## Sheet: Dam
MG-RAST ID	name	sample	library	biome	feature	material
mgm4816450.3	F211_186_L001_R1_001	mgs701728	mgl701730	intestine environment	anatomical structure	feces
mgm4816451.3	F112_105_L001_R1_001	mgs701680	mgl701682	intestine environment	anatomical structure	feces
mgm4816452.3	F174_115_L001_R1_001	mgs701710	mgl701712	intestine environment	anatomical structure	feces
mgm4816453.3	F263_52_L001_R1_001	mgs701752	mgl701754	intestine environment	anatomical structure	feces
mgm4816454.3	F5_171_L001_R1_001	mgs701629	mgl701631	intestine environment	anatomical structure	feces
mgm4816455.3	F266_51_L001_R1_001	mgs701755	mgl701757	intestine environment	anatomical structure	feces
mgm4816456.3	F505_197_L001_R1_001	mgs701860	mgl701862	intestine environment	anatomical structure	feces
mgm4816457.3	F156_82_L001_R1_001	mgs701701	mgl701703	intestine environment	anatomical structure	feces
mgm4816458.3	F121_40_L001_R1_001	mgs701686	mgl701688	intestine environment	anatomical structure	feces
mgm4816459.3	F73_101_L001_R1_001	mgs701662	mgl701664	intestine environment	anatomical structure	feces
mgm4816460.3	F424_210_L001_R1_001	mgs701812	mgl701814	intestine environment	anatomical structure	feces
mgm4816461.3	F284_218_L001_R1_001	mgs701767	mgl701769	intestine environment	anatomical structure	feces
mgm4816462.3	F30_19_L001_R1_001	mgs701638	mgl701640	intestine environment	anatomical structure	feces
mgm4816463.3	F186_50_L001_R1_001	mgs701713	mgl701715	intestine environment	anatomical structure	feces
mgm4816464.3	F351_226_L001_R1_001	mgs701794	mgl701796	intestine environment	anatomical structure	feces
mgm4816465.3	F60_213_L001_R1_001	mgs701650	mgl701652	intestine environment	anatomical structure	feces
mgm4816466.3	F452_137_L001_R1_001	mgs701824	mgl701826	intestine environment	anatomical structure	feces
mgm4816467.3	F206_4_L001_R1_001	mgs701722	mgl701724	intestine environment	anatomical structure	feces
mgm4816468.3	F269_88_L001_R1_001	mgs701758	mgl701760	intestine environment	anatomical structure	feces
mgm4816469.3	F318_28_L001_R1_001	mgs701773	mgl701775	intestine environment	anatomical structure	feces
mgm4816470.3	F147_94_L001_R1_001	mgs701695	mgl701697	intestine environment	anatomical structure	feces
mgm4816471.3	F247_110_L001_R1_001	mgs701743	mgl701745	intestine environment	anatomical structure	feces
mgm4816472.3	F515_61_L001_R1_001	mgs701866	mgl701868	intestine environment	anatomical structure	feces
mgm4816473.3	F259_24_L001_R1_001	mgs701746	mgl701748	intestine environment	anatomical structure	feces
mgm4816474.3	F231_196_L001_R1_001	mgs701737	mgl701739	intestine environment	anatomical structure	feces
mgm4816475.3	F99_136_L001_R1_001	mgs701674	mgl701676	intestine environment	anatomical structure	feces
mgm4816476.3	F278_130_L001_R1_001	mgs701764	mgl701766	intestine environment	anatomical structure	feces
mgm4816477.3	F234_46_L001_R1_001	mgs701740	mgl701742	intestine environment	anatomical structure	feces
mgm4816478.3	F225_187_L001_R1_001	mgs701731	mgl701733	intestine environment	anatomical structure	feces
mgm4816479.3	F492_228_L001_R1_001	mgs701854	mgl701856	intestine environment	anatomical structure	feces
mgm4816480.3	F85_45_L001_R1_001	mgs701668	mgl701670	intestine environment	anatomical structure	feces
mgm4816481.3	F450_41_L001_R1_001	mgs701821	mgl701823	intestine environment	anatomical structure	feces
mgm4816482.3	F286_37_L001_R1_001	mgs701770	mgl701772	intestine environment	anatomical structure	feces
mgm4816483.3	F392_108_L001_R1_001	mgs701803	mgl701805	intestine environment	anatomical structure	feces
mgm4816484.3	F463_182_L001_R1_001	mgs701827	mgl701829	intestine environment	anatomical structure	feces
mgm4816485.3	F330_95_L001_R1_001	mgs701779	mgl701781	intestine environment	anatomical structure	feces
mgm4816486.3	F133_132_L001_R1_001	mgs701689	mgl701691	intestine environment	anatomical structure	feces
mgm4816487.3	F191_56_L001_R1_001	mgs701716	mgl701718	intestine environment	anatomical structure	feces
mgm4816488.3	F150_125_L001_R1_001	mgs701698	mgl701700	intestine environment	anatomical structure	feces
mgm4816489.3	F475_22_L001_R1_001	mgs701839	mgl701841	intestine environment	anatomical structure	feces
mgm4816490.3	F480_156_L001_R1_001	mgs701842	mgl701844	intestine environment	anatomical structure	feces
mgm4816491.3	F139_201_L001_R1_001	mgs701692	mgl701694	intestine environment	anatomical structure	feces
mgm4816492.3	F95_195_L001_R1_001	mgs701671	mgl701673	intestine environment	anatomical structure	feces
mgm4816493.3	F486_199_L001_R1_001	mgs701848	mgl701850	intestine environment	anatomical structure	feces
mgm4816494.3	F168_85_L001_R1_001	mgs701707	mgl701709	intestine environment	anatomical structure	feces
mgm4816495.3	F415_80_L001_R1_001	mgs701806	mgl701808	intestine environment	anatomical structure	feces
mgm4816496.3	F466_12_L001_R1_001	mgs701830	mgl701832	intestine environment	anatomical structure	feces
mgm4816497.3	F83_163_L001_R1_001	mgs701665	mgl701667	intestine environment	anatomical structure	feces
mgm4816498.3	F528_191_L001_R1_001	mgs701869	mgl701871	intestine environment	anatomical structure	feces
mgm4816499.3	F472_73_L001_R1_001	mgs701833	mgl701835	intestine environment	anatomical structure	feces
mgm4816500.3	F64_58_L001_R1_001	mgs701653	mgl701655	intestine environment	anatomical structure	feces
mgm4816501.3	F491_33_L001_R1_001	mgs701851	mgl701853	intestine environment	anatomical structure	feces
mgm4816502.3	F68_119_L001_R1_001	mgs701656	mgl701658	intestine environment	anatomical structure	feces
mgm4816503.3	F504_66_L001_R1_001	mgs701857	mgl701859	intestine environment	anatomical structure	feces
mgm4816504.3	F433_181_L001_R1_001	mgs701818	mgl701820	intestine environment	anatomical structure	feces
mgm4816505.3	F8_92_L001_R1_001	mgs701632	mgl701634	intestine environment	anatomical structure	feces
mgm4816506.3	F271_166_L001_R1_001	mgs701761	mgl701763	intestine environment	anatomical structure	feces
mgm4816507.3	F335_16_L001_R1_001	mgs701785	mgl701787	intestine environment	anatomical structure	feces
mgm4816508.3	F390_71_L001_R1_001	mgs701800	mgl701802	intestine environment	anatomical structure	feces
mgm4816509.3	F36_135_L001_R1_001	mgs701644	mgl701646	intestine environment	anatomical structure	feces
mgm4816510.3	F18_139_L001_R1_001	mgs701635	mgl701637	intestine environment	anatomical structure	feces
mgm4816511.3	F208_165_L001_R1_001	mgs701725	mgl701727	intestine environment	anatomical structure	feces
mgm4816512.3	F481_206_L001_R1_001	mgs701845	mgl701847	intestine environment	anatomical structure	feces
mgm4816513.3	F205_225_L001_R1_001	mgs701719	mgl701721	intestine environment	anatomical structure	feces
mgm4816514.3	F369_216_L001_R1_001	mgs701797	mgl701799	intestine environment	anatomical structure	feces
mgm4816515.3	F422_18_L001_R1_001	mgs701809	mgl701811	intestine environment	anatomical structure	feces
mgm4816516.3	F474_42_L001_R1_001	mgs701836	mgl701838	intestine environment	anatomical structure	feces
mgm4816517.3	F71_147_L001_R1_001	mgs701659	mgl701661	intestine environment	anatomical structure	feces
mgm4816518.3	F261_65_L001_R1_001	mgs701749	mgl701751	intestine environment	anatomical structure	feces
mgm4816519.3	F35_8_L001_R1_001	mgs701641	mgl701643	intestine environment	anatomical structure	feces
mgm4816520.3	F116_11_L001_R1_001	mgs701683	mgl701685	intestine environment	anatomical structure	feces
mgm4816521.3	F49_107_L001_R1_001	mgs701647	mgl701649	intestine environment	anatomical structure	feces
mgm4816522.3	F336_63_L001_R1_001	mgs701788	mgl701790	intestine environment	anatomical structure	feces
mgm4816523.3	F111_98_L001_R1_001	mgs701677	mgl701679	intestine environment	anatomical structure	feces
mgm4816524.3	F431_235_L001_R1_001	mgs701815	mgl701817	intestine environment	anatomical structure	feces
mgm4816525.3	F506_142_L001_R1_001	mgs701863	mgl701865	intestine environment	anatomical structure	feces
mgm4816526.3	F163_243_L001_R1_001	mgs701704	mgl701706	intestine environment	anatomical structure	feces
mgm4816527.3	F338_49_L001_R1_001	mgs701791	mgl701793	intestine environment	anatomical structure	feces
mgm4816528.3	F322_128_L001_R1_001	mgs701776	mgl701778	intestine environment	anatomical structure	feces
mgm4816529.3	F226_161_L001_R1_001	mgs701734	mgl701736	intestine environment	anatomical structure	feces
mgm4816530.3	F334_25_L001_R1_001	mgs701782	mgl701784	intestine environment	anatomical structure	feces
008799ac166d676d343831363639332e33	V35_87_L001_R1_001	mgs702157	mgl702159	reproductive tract environment	anatomical structure	mucus
00d1395d346d676d343831363639352e33	V424_109_L001_R1_001	mgs702316	mgl702318	reproductive tract environment	anatomical structure	mucus
00e895501f6d676d343831363637392e33	V486_167_L001_R1_001	mgs702343	mgl702345	reproductive tract environment	anatomical structure	mucus
02f96fce4f6d676d343831363638302e33	V130_100_L001_R1_001	mgs702199	mgl702201	reproductive tract environment	anatomical structure	mucus
03a49b90046d676d343831363731342e33	V156_103_L001_R1_001	mgs702211	mgl702213	reproductive tract environment	anatomical structure	mucus
08a1aa53e76d676d343831363730362e33	V30_30_L001_R1_001	mgs702154	mgl702156	reproductive tract environment	anatomical structure	mucus
0ca8bd9f366d676d343831363731302e33	V491_60_L001_R1_001	mgs702346	mgl702348	reproductive tract environment	anatomical structure	mucus
126d9a40186d676d343831363639342e33	V226_138_L001_R1_001	mgs702244	mgl702246	reproductive tract environment	anatomical structure	mucus
147ddef4f16d676d343831363638382e33	V150_14_L001_R1_001	mgs702208	mgl702210	reproductive tract environment	anatomical structure	mucus
16dd5cf60a6d676d343831363639302e33	V168_76_L001_R1_001	mgs702217	mgl702219	reproductive tract environment	anatomical structure	mucus
16f4adf05d6d676d343831363638372e33	V336_96_L001_R1_001	mgs702292	mgl702294	reproductive tract environment	anatomical structure	mucus
195ee1f3746d676d343831363731332e33	V60_255_L001_R1_001	mgs702166	mgl702168	reproductive tract environment	anatomical structure	mucus
1c7cb9dc4b6d676d343831363639322e33	V392_111_L001_R1_001	mgs702304	mgl702306	reproductive tract environment	anatomical structure	mucus
1dca13cbaf6d676d343831363732362e33	V330_93_L001_R1_001	mgs702283	mgl702285	reproductive tract environment	anatomical structure	mucus
2227581fbb6d676d343831363637302e33	V286_205_L001_R1_001	mgs702274	mgl702276	reproductive tract environment	anatomical structure	mucus
22f36c68b66d676d343831363730302e33	V99_204_L001_R1_001	mgs702190	mgl702192	reproductive tract environment	anatomical structure	mucus
28c5d39e626d676d343831363730352e33	V318_50_L001_R1_001	mgs702277	mgl702279	reproductive tract environment	anatomical structure	mucus
2ae05487e36d676d343831363732322e33	V8_159_L001_R1_001	mgs702148	mgl702150	reproductive tract environment	anatomical structure	mucus
2ceb0e591a6d676d343831363732332e33	V95_99_L001_R1_001	mgs702187	mgl702189	reproductive tract environment	anatomical structure	mucus
2fb0791ebf6d676d343831363730322e33	V390_140_L001_R1_001	mgs702301	mgl702303	reproductive tract environment	anatomical structure	mucus
3bed4962cf6d676d343831363733302e33	V64_175_L001_R1_001	mgs702169	mgl702171	reproductive tract environment	anatomical structure	mucus
3f768c4d4c6d676d343831363636372e33	V261_104_L001_R1_001	mgs702259	mgl702261	reproductive tract environment	anatomical structure	mucus
47316064f46d676d343831363732352e33	V322_3_L001_R1_001	mgs702280	mgl702282	reproductive tract environment	anatomical structure	mucus
484fe4d3b46d676d343831363730372e33	V278_223_L001_R1_001	mgs702268	mgl702270	reproductive tract environment	anatomical structure	mucus
5daac274726d676d343831363636362e33	V147_129_L001_R1_001	mgs702205	mgl702207	reproductive tract environment	anatomical structure	mucus
5eb7668fe36d676d343831363637362e33	V186_120_L001_R1_001	mgs702223	mgl702225	reproductive tract environment	anatomical structure	mucus
671cce071d6d676d343831363731322e33	V335_164_L001_R1_001	mgs702289	mgl702291	reproductive tract environment	anatomical structure	mucus
690f13f2f56d676d343831363637332e33	V225_31_L001_R1_001	mgs702241	mgl702243	reproductive tract environment	anatomical structure	mucus
69d0c6c0916d676d343831363731362e33	V259_39_L001_R1_001	mgs702256	mgl702258	reproductive tract environment	anatomical structure	mucus
6b847836016d676d343831363639382e33	V504_116_L001_R1_001	mgs702352	mgl702354	reproductive tract environment	anatomical structure	mucus
6fea1de48d6d676d343831363639362e33	V515_75_L001_R1_001	mgs702358	mgl702360	reproductive tract environment	anatomical structure	mucus
7507d4aac06d676d343831363637372e33	V49_102_L001_R1_001	mgs702163	mgl702165	reproductive tract environment	anatomical structure	mucus
797b0dbc286d676d343831363637312e33	V231_123_L001_R1_001	mgs702247	mgl702249	reproductive tract environment	anatomical structure	mucus
7f3d2dab1b6d676d343831363730342e33	V112_203_L001_R1_001	mgs702193	mgl702195	reproductive tract environment	anatomical structure	mucus
7feba2b8756d676d343831363637352e33	V133_170_L001_R1_001	mgs702202	mgl702204	reproductive tract environment	anatomical structure	mucus
817fa470f66d676d343831363732382e33	V266_173_L001_R1_001	mgs702265	mgl702267	reproductive tract environment	anatomical structure	mucus
8cbf9922f06d676d343831363636382e33	V116_121_L001_R1_001	mgs702196	mgl702198	reproductive tract environment	anatomical structure	mucus
92a1e6a76e6d676d343831363733332e33	V398_117_L001_R1_001	mgs702307	mgl702309	reproductive tract environment	anatomical structure	mucus
92ec73b95f6d676d343831363638332e33	V191_146_L001_R1_001	mgs702226	mgl702228	reproductive tract environment	anatomical structure	mucus
95126596ef6d676d343831363639392e33	V163_91_L001_R1_001	mgs702214	mgl702216	reproductive tract environment	anatomical structure	mucus
995fd58c6e6d676d343831363638322e33	V422_67_L001_R1_001	mgs702313	mgl702315	reproductive tract environment	anatomical structure	mucus
9ab158b3b66d676d343831363732392e33	V73_90_L001_R1_001	mgs702178	mgl702180	reproductive tract environment	anatomical structure	mucus
9aceb723b26d676d343831363732302e33	V506_246_L001_R1_001	mgs702355	mgl702357	reproductive tract environment	anatomical structure	mucus
9b277d0ffd6d676d343831363731382e33	V71_180_L001_R1_001	mgs702175	mgl702177	reproductive tract environment	anatomical structure	mucus
a1dc2c14cc6d676d343831363637322e33	V205_150_L001_R1_001	mgs702229	mgl702231	reproductive tract environment	anatomical structure	mucus
a5bf2840cd6d676d343831363638392e33	V472_64_L001_R1_001	mgs702331	mgl702333	reproductive tract environment	anatomical structure	mucus
a87222fc106d676d343831363733312e33	V338_23_L001_R1_001	mgs702295	mgl702297	reproductive tract environment	anatomical structure	mucus
afb08da8ad6d676d343831363731392e33	V431_70_L001_R1_001	mgs702319	mgl702321	reproductive tract environment	anatomical structure	mucus
b0d8d447776d676d343831363637382e33	V247_77_L001_R1_001	mgs702253	mgl702255	reproductive tract environment	anatomical structure	mucus
b7b83f3f066d676d343831363730332e33	V36_209_L001_R1_001	mgs702160	mgl702162	reproductive tract environment	anatomical structure	mucus
c0c61ef1b16d676d343831363636342e33	V206_192_L001_R1_001	mgs702232	mgl702234	reproductive tract environment	anatomical structure	mucus
c25f29b39c6d676d343831363636392e33	V369_78_L001_R1_001	mgs702298	mgl702300	reproductive tract environment	anatomical structure	mucus
c36b3e5c0b6d676d343831363636332e33	V475_44_L001_R1_001	mgs702337	mgl702339	reproductive tract environment	anatomical structure	mucus
c372e6149c6d676d343831363636352e33	V263_152_L001_R1_001	mgs702262	mgl702264	reproductive tract environment	anatomical structure	mucus
cd96901cb96d676d343831363731312e33	V452_215_L001_R1_001	mgs702328	mgl702330	reproductive tract environment	anatomical structure	mucus
ce63cbaf906d676d343831363733322e33	V492_9_L001_R1_001	mgs702349	mgl702351	reproductive tract environment	anatomical structure	mucus
d1c74782cf6d676d343831363730382e33	V234_207_L001_R1_001	mgs702250	mgl702252	reproductive tract environment	anatomical structure	mucus
d92803d76f6d676d343831363733342e33	V208_183_L001_R1_001	mgs702235	mgl702237	reproductive tract environment	anatomical structure	mucus
dc480525946d676d343831363731372e33	V5_62_L001_R1_001	mgs702145	mgl702147	reproductive tract environment	anatomical structure	mucus
e07d5676bd6d676d343831363639312e33	V211_53_L001_R1_001	mgs702238	mgl702240	reproductive tract environment	anatomical structure	mucus
e2096f27636d676d343831363731352e33	V481_222_L001_R1_001	mgs702340	mgl702342	reproductive tract environment	anatomical structure	mucus
e2a88f6c906d676d343831363732312e33	V334_219_L001_R1_001	mgs702286	mgl702288	reproductive tract environment	anatomical structure	mucus
e8189c76f96d676d343831363637342e33	V284_54_L001_R1_001	mgs702271	mgl702273	reproductive tract environment	anatomical structure	mucus
edac477d586d676d343831363638362e33	V83_97_L001_R1_001	mgs702181	mgl702183	reproductive tract environment	anatomical structure	mucus
efedfccbc96d676d343831363639372e33	V415_32_L001_R1_001	mgs702310	mgl702312	reproductive tract environment	anatomical structure	mucus
f0b42359886d676d343831363638342e33	V85_83_L001_R1_001	mgs702184	mgl702186	reproductive tract environment	anatomical structure	mucus
f2ca383c316d676d343831363638352e33	V18_127_L001_R1_001	mgs702151	mgl702153	reproductive tract environment	anatomical structure	mucus
f4bb925a0c6d676d343831363732342e33	V450_20_L001_R1_001	mgs702325	mgl702327	reproductive tract environment	anatomical structure	mucus
f65a46a1c86d676d343831363730392e33	V474_47_L001_R1_001	mgs702334	mgl702336	reproductive tract environment	anatomical structure	mucus
f92702d4596d676d343831363730312e33	V174_239_L001_R1_001	mgs702220	mgl702222	reproductive tract environment	anatomical structure	mucus
fc14266da76d676d343831363732372e33	V68_190_L001_R1_001	mgs702172	mgl702174	reproductive tract environment	anatomical structure	mucus
fec573f01f6d676d343831363638312e33	V433_114_L001_R1_001	mgs702322	mgl702324	reproductive tract environment	anatomical structure	mucus

## Sheet: Calf
MG-RAST ID	name	sample	library	Internal ID of sample	Age	biome	feature	material
mgm4817142.3	CR18_133_L001_R1_001	mgs702772	mgl702774	24707	3 days	respiratory tract environment	anatomical structure	mucus
mgm4817190.3	CR20_48_L001_R1_001	mgs702781	mgl702783	24713	3 days	respiratory tract environment	anatomical structure	mucus
mgm4817133.3	CR635_11_L001_R1_001	mgs703018	mgl703020	24828	35 days	respiratory tract environment	anatomical structure	mucus
mgm4817093.3	CR588_8_L001_R1_001	mgs702778	mgl702780	24707	35 days	respiratory tract environment	anatomical structure	mucus
mgm4817108.3	CR207_123_L001_R1_001	mgs702766	mgl702768	24705	14 days	respiratory tract environment	anatomical structure	mucus
mgm4816993.3	CR31_118_L001_R1_001	mgs702823	mgl702825	24739	3 days	respiratory tract environment	anatomical structure	mucus
mgm4817097.3	CR667_64_L001_R1_001	mgs703141	mgl703143	24914	35 days	respiratory tract environment	anatomical structure	mucus
mgm4817127.3	CR347_9_L001_R1_001	mgs703336	mgl703338	25086	14 days	respiratory tract environment	anatomical structure	mucus
mgm4817168.3	CR643_35_L001_R1_001	mgs703072	mgl703074	24854	35 days	respiratory tract environment	anatomical structure	mucus
mgm4817047.3	CR336_72_L001_R1_001	mgs703309	mgl703311	25067	14 days	respiratory tract environment	anatomical structure	mucus
mgm4817029.3	CR657_9_L001_R1_001	mgs703114	mgl703116	24891	35 days	respiratory tract environment	anatomical structure	mucus
mgm4817119.3	CR62_114_L001_R1_001	mgs702985	mgl702987	24819	3 days	respiratory tract environment	anatomical structure	mucus
mgm4817055.3	CR13_119_L001_R1_001	mgs702745	mgl702747	24690	3 days	respiratory tract environment	anatomical structure	mucus
mgm4817173.3	CR249_5_L001_R1_001	mgs702961	mgl702963	24816	14 days	respiratory tract environment	anatomical structure	mucus
mgm4817138.3	CR64_133_L001_R1_001	mgs703003	mgl703005	24825	3 days	respiratory tract environment	anatomical structure	mucus
mgm4817025.3	CR164_23_L001_R1_001	mgs703357	mgl703359	25106	3 days	respiratory tract environment	anatomical structure	mucus
mgm4817072.3	CR277_2_L001_R1_001	mgs703111	mgl703113	24891	14 days	respiratory tract environment	anatomical structure	mucus
mgm4817078.3	CR136_102_L001_R1_001	mgs703279	mgl703281	25046	3 days	respiratory tract environment	anatomical structure	mucus
mgm4817001.3	CR63_113_L001_R1_001	mgs702994	mgl702996	24820	3 days	respiratory tract environment	anatomical structure	mucus
mgm4817074.3	CR583_34_L001_R1_001	mgs702751	mgl702753	24690	35 days	respiratory tract environment	anatomical structure	mucus
mgm4817013.3	CR652_61_L001_R1_001	mgs703087	mgl703089	24883	35 days	respiratory tract environment	anatomical structure	mucus
mgm4817149.3	CR700_37_L001_R1_001	mgs703249	mgl703251	25025	35 days	respiratory tract environment	anatomical structure	mucus
mgm4817091.3	CR66_42_L001_R1_001	mgs703021	mgl703023	24832	3 days	respiratory tract environment	anatomical structure	mucus
mgm4817083.3	CR602_83_L001_R1_001	mgs702838	mgl702840	24740	35 days	respiratory tract environment	anatomical structure	mucus
mgm4817090.3	CR222_121_L001_R1_001	mgs702835	mgl702837	24740	14 days	respiratory tract environment	anatomical structure	mucus
mgm4817188.3	CR629_131_L001_R1_001	mgs702964	mgl702966	24816	35 days	respiratory tract environment	anatomical structure	mucus
mgm4817158.3	CR55_59_L001_R1_001	mgs702922	mgl702924	24806	3 days	respiratory tract environment	anatomical structure	mucus
mgm4817192.3	CR82_39_L001_R1_001	mgs703081	mgl703083	24883	3 days	respiratory tract environment	anatomical structure	mucus
mgm4817086.3	CR160_44_L001_R1_001	mgs703345	mgl703347	25096	3 days	respiratory tract environment	anatomical structure	mucus
mgm4817010.3	CR275_27_L001_R1_001	mgs703102	mgl703104	24889	14 days	respiratory tract environment	anatomical structure	mucus
mgm4816989.3	CR159_103_L001_R1_001	mgs703339	mgl703341	25095	3 days	respiratory tract environment	anatomical structure	mucus
mgm4817011.3	CR606_6_L001_R1_001	mgs702865	mgl702867	24749	35 days	respiratory tract environment	anatomical structure	mucus
mgm4817008.3	CR262_110_L001_R1_001	mgs703060	mgl703062	24853	14 days	respiratory tract environment	anatomical structure	mucus
mgm4817145.3	CR50_130_L001_R1_001	mgs702895	mgl702897	24795	3 days	respiratory tract environment	anatomical structure	mucus
mgm4817137.3	CR133_73_L001_R1_001	mgs703261	mgl703263	25037	3 days	respiratory tract environment	anatomical structure	mucus
mgm4817153.3	CR102_13_L001_R1_001	mgs703153	mgl703155	24938	3 days	respiratory tract environment	anatomical structure	mucus
mgm4817037.3	CR625_29_L001_R1_001	mgs702928	mgl702930	24806	35 days	respiratory tract environment	anatomical structure	mucus
mgm4817118.3	CR676_71_L001_R1_001	mgs703180	mgl703182	24949	35 days	respiratory tract environment	anatomical structure	mucus
mgm4816991.3	CR346_62_L001_R1_001	mgs703330	mgl703332	25085	14 days	respiratory tract environment	anatomical structure	mucus
mgm4817014.3	CR26_136_L001_R1_001	mgs702808	mgl702810	24730	3 days	respiratory tract environment	anatomical structure	mucus
mgm4817156.3	CR599_134_L001_R1_001	mgs702820	mgl702822	24735	35 days	respiratory tract environment	anatomical structure	mucus
mgm4817202.3	CR250_122_L001_R1_001	mgs702970	mgl702972	24817	14 days	respiratory tract environment	anatomical structure	mucus
mgm4817196.3	CR305_31_L001_R1_001	mgs703210	mgl703212	24977	14 days	respiratory tract environment	anatomical structure	mucus
mgm4817150.3	CR240_21_L001_R1_001	mgs702898	mgl702900	24795	14 days	respiratory tract environment	anatomical structure	mucus
mgm4817160.3	CR94_80_L001_R1_001	mgs703126	mgl703128	24906	3 days	respiratory tract environment	anatomical structure	mucus
mgm4817050.3	CR208_138_L001_R1_001	mgs702775	mgl702777	24707	14 days	respiratory tract environment	anatomical structure	mucus
mgm4816996.3	CR603_36_L001_R1_001	mgs702847	mgl702849	24742	35 days	respiratory tract environment	anatomical structure	mucus
mgm4817036.3	CR590_89_L001_R1_001	mgs702787	mgl702789	24713	35 days	respiratory tract environment	anatomical structure	mucus
mgm4817081.3	CR673_23_L001_R1_001	mgs703168	mgl703170	24941	35 days	respiratory tract environment	anatomical structure	mucus
mgm4817194.3	CR642_15_L001_R1_001	mgs703063	mgl703065	24853	35 days	respiratory tract environment	anatomical structure	mucus
mgm4817003.3	CR272_13_L001_R1_001	mgs703084	mgl703086	24883	14 days	respiratory tract environment	anatomical structure	mucus
mgm4817004.3	CR628_100_L001_R1_001	mgs702955	mgl702957	24815	35 days	respiratory tract environment	anatomical structure	mucus
mgm4817059.3	CR615_51_L001_R1_001	mgs702892	mgl702894	24776	35 days	respiratory tract environment	anatomical structure	mucus
mgm4817204.3	CR258_86_L001_R1_001	mgs703042	mgl703044	24841	14 days	respiratory tract environment	anatomical structure	mucus
mgm4817159.3	CR97_56_L001_R1_001	mgs703135	mgl703137	24914	3 days	respiratory tract environment	anatomical structure	mucus
mgm4817185.3	CR293_127_L001_R1_001	mgs703165	mgl703167	24941	14 days	respiratory tract environment	anatomical structure	mucus
mgm4817053.3	CR672_41_L001_R1_001	mgs703159	mgl703161	24938	35 days	respiratory tract environment	anatomical structure	mucus
mgm4817161.3	CR123_83_L001_R1_001	mgs703234	mgl703236	25008	3 days	respiratory tract environment	anatomical structure	mucus
mgm4817154.3	CR302_43_L001_R1_001	mgs703201	mgl703203	24962	14 days	respiratory tract environment	anatomical structure	mucus
mgm4817028.3	CR355_52_L001_R1_001	mgs703366	mgl703368	25107	14 days	respiratory tract environment	anatomical structure	mucus
mgm4817040.3	CR32_75_L001_R1_001	mgs702832	mgl702834	24740	3 days	respiratory tract environment	anatomical structure	mucus
mgm4817017.3	CR37_126_L001_R1_001	mgs702868	mgl702870	24759	3 days	respiratory tract environment	anatomical structure	mucus
mgm4817201.3	CR78_95_L001_R1_001	mgs703075	mgl703077	24867	3 days	respiratory tract environment	anatomical structure	mucus
mgm4817148.3	CR36_101_L001_R1_001	mgs702859	mgl702861	24749	3 days	respiratory tract environment	anatomical structure	mucus
mgm4816994.3	CR671_82_L001_R1_001	mgs703150	mgl703152	24931	35 days	respiratory tract environment	anatomical structure	mucus
mgm4817107.3	CR248_90_L001_R1_001	mgs702952	mgl702954	24815	14 days	respiratory tract environment	anatomical structure	mucus
mgm4817023.3	CR72_22_L001_R1_001	mgs703057	mgl703059	24853	3 days	respiratory tract environment	anatomical structure	mucus
mgm4817181.3	CR311_111_L001_R1_001	mgs703228	mgl703230	25004	14 days	respiratory tract environment	anatomical structure	mucus
mgm4817143.3	CR132_55_L001_R1_001	mgs703252	mgl703254	25035	3 days	respiratory tract environment	anatomical structure	mucus
mgm4817027.3	CR65_26_L001_R1_001	mgs703012	mgl703014	24828	3 days	respiratory tract environment	anatomical structure	mucus
mgm4816999.3	CR211_73_L001_R1_001	mgs702793	mgl702795	24715	14 days	respiratory tract environment	anatomical structure	mucus
mgm4817071.3	CR246_116_L001_R1_001	mgs702934	mgl702936	24808	14 days	respiratory tract environment	anatomical structure	mucus
mgm4817165.3	CR85_24_L001_R1_001	mgs703099	mgl703101	24889	3 days	respiratory tract environment	anatomical structure	mucus
mgm4817113.3	CR253_109_L001_R1_001	mgs702997	mgl702999	24820	14 days	respiratory tract environment	anatomical structure	mucus
mgm4817060.3	CR322_119_L001_R1_001	mgs703255	mgl703257	25035	14 days	respiratory tract environment	anatomical structure	mucus
mgm4817140.3	CR611_25_L001_R1_001	mgs702883	mgl702885	24766	35 days	respiratory tract environment	anatomical structure	mucus
mgm4817141.3	CR203_120_L001_R1_001	mgs702748	mgl702750	24690	14 days	respiratory tract environment	anatomical structure	mucus
mgm4817075.3	CR165_32_L001_R1_001	mgs703363	mgl703365	25107	3 days	respiratory tract environment	anatomical structure	mucus
mgm4817109.3	CR632_113_L001_R1_001	mgs702991	mgl702993	24819	35 days	respiratory tract environment	anatomical structure	mucus
mgm4817038.3	CR219_71_L001_R1_001	mgs702817	mgl702819	24735	14 days	respiratory tract environment	anatomical structure	mucus
mgm4817065.3	CR168_47_L001_R1_001	mgs703375	mgl703377	25112	3 days	respiratory tract environment	anatomical structure	mucus
mgm4816986.3	CR56_25_L001_R1_001	mgs702931	mgl702933	24808	3 days	respiratory tract environment	anatomical structure	mucus
mgm4816987.3	CR358_6_L001_R1_001	mgs703378	mgl703380	25112	14 days	respiratory tract environment	anatomical structure	mucus
mgm4817128.3	CR87_33_L001_R1_001	mgs703108	mgl703110	24891	3 days	respiratory tract environment	anatomical structure	mucus
mgm4817085.3	CR711_101_L001_R1_001	mgs703303	mgl703305	25054	35 days	respiratory tract environment	anatomical structure	mucus
mgm4817034.3	CR235_29_L001_R1_001	mgs702889	mgl702891	24776	14 days	respiratory tract environment	anatomical structure	mucus
mgm4817048.3	CR226_68_L001_R1_001	mgs702862	mgl702864	24749	14 days	respiratory tract environment	anatomical structure	mucus
mgm4817180.3	CR627_106_L001_R1_001	mgs702946	mgl702948	24814	35 days	respiratory tract environment	anatomical structure	mucus
mgm4817130.3	CR327_24_L001_R1_001	mgs703291	mgl703293	25047	14 days	respiratory tract environment	anatomical structure	mucus
mgm4817057.3	CR52_18_L001_R1_001	mgs702904	mgl702906	24798	3 days	respiratory tract environment	anatomical structure	mucus
mgm4817082.3	CR83_89_L001_R1_001	mgs703090	mgl703092	24884	3 days	respiratory tract environment	anatomical structure	mucus
mgm4817020.3	CR340_88_L001_R1_001	mgs703318	mgl703320	25072	14 days	respiratory tract environment	anatomical structure	mucus
mgm4817179.3	CR702_95_L001_R1_001	mgs703258	mgl703260	25035	35 days	respiratory tract environment	anatomical structure	mucus
mgm4817016.3	CR29_101_L001_R1_001	mgs702814	mgl702816	24735	3 days	respiratory tract environment	anatomical structure	mucus
mgm4817092.3	CR323_92_L001_R1_001	mgs703264	mgl703266	25037	14 days	respiratory tract environment	anatomical structure	mucus
mgm4816988.3	CR716_60_L001_R1_001	mgs703312	mgl703314	25067	35 days	respiratory tract environment	anatomical structure	mucus
mgm4816985.3	CR254_45_L001_R1_001	mgs703006	mgl703008	24825	14 days	respiratory tract environment	anatomical structure	mucus
mgm4817116.3	CR679_85_L001_R1_001	mgs703186	mgl703188	24953	35 days	respiratory tract environment	anatomical structure	mucus
mgm4817177.3	CR59_140_L001_R1_001	mgs702958	mgl702960	24816	3 days	respiratory tract environment	anatomical structure	mucus
mgm4817182.3	CR638_13_L001_R1_001	mgs703045	mgl703047	24841	35 days	respiratory tract environment	anatomical structure	mucus
mgm4817002.3	CR593_127_L001_R1_001	mgs702805	mgl702807	24724	35 days	respiratory tract environment	anatomical structure	mucus
mgm4817195.3	CR213_66_L001_R1_001	mgs702802	mgl702804	24724	14 days	respiratory tract environment	anatomical structure	mucus
mgm4817131.3	CR622_50_L001_R1_001	mgs702910	mgl702912	24798	35 days	respiratory tract environment	anatomical structure	mucus
mgm4817122.3	CR707_136_L001_R1_001	mgs703294	mgl703296	25047	35 days	respiratory tract environment	anatomical structure	mucus
mgm4817163.3	CR156_64_L001_R1_001	mgs703327	mgl703329	25085	3 days	respiratory tract environment	anatomical structure	mucus
mgm4817056.3	CR287_18_L001_R1_001	mgs703138	mgl703140	24914	14 days	respiratory tract environment	anatomical structure	mucus
mgm4817147.3	CR120_109_L001_R1_001	mgs703216	mgl703218	25001	3 days	respiratory tract environment	anatomical structure	mucus
mgm4817015.3	CR620_43_L001_R1_001	mgs702901	mgl702903	24795	35 days	respiratory tract environment	anatomical structure	mucus
mgm4817033.3	CR331_121_L001_R1_001	mgs703300	mgl703302	25054	14 days	respiratory tract environment	anatomical structure	mucus
mgm4817203.3	CR242_95_L001_R1_001	mgs702907	mgl702909	24798	14 days	respiratory tract environment	anatomical structure	mucus
mgm4817039.3	CR150_90_L001_R1_001	mgs703315	mgl703317	25072	3 days	respiratory tract environment	anatomical structure	mucus
mgm4816990.3	CR58_100_L001_R1_001	mgs702949	mgl702951	24815	3 days	respiratory tract environment	anatomical structure	mucus
mgm4816998.3	CR23_26_L001_R1_001	mgs702799	mgl702801	24724	3 days	respiratory tract environment	anatomical structure	mucus
mgm4817066.3	CR21_43_L001_R1_001	mgs702790	mgl702792	24715	3 days	respiratory tract environment	anatomical structure	mucus
mgm4817125.3	CR626_53_L001_R1_001	mgs702937	mgl702939	24808	35 days	respiratory tract environment	anatomical structure	mucus
mgm4817096.3	CR634_21_L001_R1_001	mgs703009	mgl703011	24825	35 days	respiratory tract environment	anatomical structure	mucus
mgm4817175.3	CR623_124_L001_R1_001	mgs702919	mgl702921	24799	35 days	respiratory tract environment	anatomical structure	mucus
mgm4817070.3	CR604_70_L001_R1_001	mgs702856	mgl702858	24744	35 days	respiratory tract environment	anatomical structure	mucus
mgm4817174.3	CR587_66_L001_R1_001	mgs702769	mgl702771	24705	35 days	respiratory tract environment	anatomical structure	mucus
mgm4817088.3	CR301_61_L001_R1_001	mgs703192	mgl703194	24958	14 days	respiratory tract environment	anatomical structure	mucus
mgm4817009.3	CR157_85_L001_R1_001	mgs703333	mgl703335	25086	3 days	respiratory tract environment	anatomical structure	mucus
mgm4817111.3	CR681_99_L001_R1_001	mgs703195	mgl703197	24958	35 days	respiratory tract environment	anatomical structure	mucus
mgm4817062.3	CR591_24_L001_R1_001	mgs702796	mgl702798	24715	35 days	respiratory tract environment	anatomical structure	mucus
mgm4817006.3	CR659_68_L001_R1_001	mgs703123	mgl703125	24896	35 days	respiratory tract environment	anatomical structure	mucus
mgm4817076.3	CR648_39_L001_R1_001	mgs703078	mgl703080	24867	35 days	respiratory tract environment	anatomical structure	mucus
mgm4817186.3	CR89_41_L001_R1_001	mgs703117	mgl703119	24896	3 days	respiratory tract environment	anatomical structure	mucus
mgm4817095.3	CR313_136_L001_R1_001	mgs703237	mgl703239	25008	14 days	respiratory tract environment	anatomical structure	mucus
mgm4817019.3	CR45_107_L001_R1_001	mgs702886	mgl702888	24776	3 days	respiratory tract environment	anatomical structure	mucus
mgm4817115.3	CR601_91_L001_R1_001	mgs702829	mgl702831	24739	35 days	respiratory tract environment	anatomical structure	mucus
mgm4817110.3	CR664_17_L001_R1_001	mgs703132	mgl703134	24906	35 days	respiratory tract environment	anatomical structure	mucus
mgm4817134.3	CR705_108_L001_R1_001	mgs703276	mgl703278	25045	35 days	respiratory tract environment	anatomical structure	mucus
mgm4817167.3	CR354_96_L001_R1_001	mgs703360	mgl703362	25106	14 days	respiratory tract environment	anatomical structure	mucus
mgm4817124.3	CR633_54_L001_R1_001	mgs703000	mgl703002	24820	35 days	respiratory tract environment	anatomical structure	mucus
mgm4817084.3	CR637_7_L001_R1_001	mgs703036	mgl703038	24837	35 days	respiratory tract environment	anatomical structure	mucus
mgm4817026.3	CR691_130_L001_R1_001	mgs703231	mgl703233	25004	35 days	respiratory tract environment	anatomical structure	mucus
mgm4817064.3	CR16_58_L001_R1_001	mgs702754	mgl702756	24703	3 days	respiratory tract environment	anatomical structure	mucus
mgm4817129.3	CR351_77_L001_R1_001	mgs703354	mgl703356	25097	14 days	respiratory tract environment	anatomical structure	mucus
mgm4817045.3	CR206_83_L001_R1_001	mgs702757	mgl702759	24703	14 days	respiratory tract environment	anatomical structure	mucus
mgm4817200.3	CR292_103_L001_R1_001	mgs703156	mgl703158	24938	14 days	respiratory tract environment	anatomical structure	mucus
mgm4817041.3	CR68_8_L001_R1_001	mgs703039	mgl703041	24841	3 days	respiratory tract environment	anatomical structure	mucus
mgm4817123.3	CR141_16_L001_R1_001	mgs703297	mgl703299	25054	3 days	respiratory tract environment	anatomical structure	mucus
mgm4817102.3	CR210_126_L001_R1_001	mgs702784	mgl702786	24713	14 days	respiratory tract environment	anatomical structure	mucus
mgm4817171.3	CR641_2_L001_R1_001	mgs703054	mgl703056	24844	35 days	respiratory tract environment	anatomical structure	mucus
mgm4817077.3	CR375_32_L001_R1_001	mgs703402	mgl703404	25175	14 days	respiratory tract environment	anatomical structure	mucus
mgm4817054.3	CR109_51_L001_R1_001	mgs703183	mgl703185	24953	3 days	respiratory tract environment	anatomical structure	mucus
mgm4817079.3	CR291_106_L001_R1_001	mgs703147	mgl703149	24931	14 days	respiratory tract environment	anatomical structure	mucus
mgm4817061.3	CR693_73_L001_R1_001	mgs703240	mgl703242	25008	35 days	respiratory tract environment	anatomical structure	mucus
mgm4817099.3	CR174_46_L001_R1_001	mgs703381	mgl703383	25128	3 days	respiratory tract environment	anatomical structure	mucus
mgm4817021.3	CR175_115_L001_R1_001	mgs703387	mgl703389	25141	3 days	respiratory tract environment	anatomical structure	mucus
mgm4817191.3	CR630_81_L001_R1_001	mgs702973	mgl702975	24817	35 days	respiratory tract environment	anatomical structure	mucus
mgm4817063.3	CR349_4_L001_R1_001	mgs703342	mgl703344	25095	14 days	respiratory tract environment	anatomical structure	mucus
mgm4817187.3	CR706_58_L001_R1_001	mgs703285	mgl703287	25046	35 days	respiratory tract environment	anatomical structure	mucus
mgm4817199.3	CR279_133_L001_R1_001	mgs703120	mgl703122	24896	14 days	respiratory tract environment	anatomical structure	mucus
mgm4817087.3	CR60_110_L001_R1_001	mgs702967	mgl702969	24817	3 days	respiratory tract environment	anatomical structure	mucus
mgm4817164.3	CR284_87_L001_R1_001	mgs703129	mgl703131	24906	14 days	respiratory tract environment	anatomical structure	mucus
mgm4817105.3	CR607_42_L001_R1_001	mgs702874	mgl702876	24759	35 days	respiratory tract environment	anatomical structure	mucus
mgm4817069.3	CR167_108_L001_R1_001	mgs703369	mgl703371	25110	3 days	respiratory tract environment	anatomical structure	mucus
mgm4817052.3	CR111_6_L001_R1_001	mgs703189	mgl703191	24958	3 days	respiratory tract environment	anatomical structure	mucus
mgm4817189.3	CR325_15_L001_R1_001	mgs703273	mgl703275	25045	14 days	respiratory tract environment	anatomical structure	mucus
mgm4817000.3	CR112_91_L001_R1_001	mgs703198	mgl703200	24962	3 days	respiratory tract environment	anatomical structure	mucus
mgm4817044.3	CR223_80_L001_R1_001	mgs702844	mgl702846	24742	14 days	respiratory tract environment	anatomical structure	mucus
mgm4817080.3	CR685_80_L001_R1_001	mgs703213	mgl703215	24977	35 days	respiratory tract environment	anatomical structure	mucus
mgm4816984.3	CR320_8_L001_R1_001	mgs703246	mgl703248	25025	14 days	respiratory tract environment	anatomical structure	mucus
mgm4817166.3	CR245_70_L001_R1_001	mgs702925	mgl702927	24806	14 days	respiratory tract environment	anatomical structure	mucus
mgm4817146.3	CR224_42_L001_R1_001	mgs702853	mgl702855	24744	14 days	respiratory tract environment	anatomical structure	mucus
mgm4817030.3	CR227_107_L001_R1_001	mgs702871	mgl702873	24759	14 days	respiratory tract environment	anatomical structure	mucus
mgm4817089.3	CR71_17_L001_R1_001	mgs703048	mgl703050	24844	3 days	respiratory tract environment	anatomical structure	mucus
mgm4817121.3	CR251_4_L001_R1_001	mgs702979	mgl702981	24818	14 days	respiratory tract environment	anatomical structure	mucus
mgm4817049.3	CR261_84_L001_R1_001	mgs703051	mgl703053	24844	14 days	respiratory tract environment	anatomical structure	mucus
mgm4817183.3	CR365_98_L001_R1_001	mgs703390	mgl703392	25141	14 days	respiratory tract environment	anatomical structure	mucus
mgm4817031.3	CR631_117_L001_R1_001	mgs702982	mgl702984	24818	35 days	respiratory tract environment	anatomical structure	mucus
mgm4817101.3	CR181_57_L001_R1_001	mgs703393	mgl703395	25161	3 days	respiratory tract environment	anatomical structure	mucus
mgm4817117.3	CR263_39_L001_R1_001	mgs703069	mgl703071	24854	14 days	respiratory tract environment	anatomical structure	mucus
mgm4817155.3	CR130_54_L001_R1_001	mgs703243	mgl703245	25025	3 days	respiratory tract environment	anatomical structure	mucus
mgm4817132.3	CR243_114_L001_R1_001	mgs702916	mgl702918	24799	14 days	respiratory tract environment	anatomical structure	mucus
mgm4817197.3	CR161_137_L001_R1_001	mgs703351	mgl703353	25097	3 days	respiratory tract environment	anatomical structure	mucus
mgm4817035.3	CR364_17_L001_R1_001	mgs703384	mgl703386	25128	14 days	respiratory tract environment	anatomical structure	mucus
mgm4817135.3	CR310_125_L001_R1_001	mgs703219	mgl703221	25001	14 days	respiratory tract environment	anatomical structure	mucus
mgm4817022.3	CR357_79_L001_R1_001	mgs703372	mgl703374	25110	14 days	respiratory tract environment	anatomical structure	mucus
mgm4817098.3	CR67_98_L001_R1_001	mgs703030	mgl703032	24837	3 days	respiratory tract environment	anatomical structure	mucus
mgm4817103.3	CR326_109_L001_R1_001	mgs703282	mgl703284	25046	14 days	respiratory tract environment	anatomical structure	mucus
mgm4817058.3	CR61_19_L001_R1_001	mgs702976	mgl702978	24818	3 days	respiratory tract environment	anatomical structure	mucus
mgm4817152.3	CR185_139_L001_R1_001	mgs703399	mgl703401	25175	3 days	respiratory tract environment	anatomical structure	mucus
mgm4817184.3	CR257_77_L001_R1_001	mgs703033	mgl703035	24837	14 days	respiratory tract environment	anatomical structure	mucus
mgm4817068.3	CR57_53_L001_R1_001	mgs702940	mgl702942	24814	3 days	respiratory tract environment	anatomical structure	mucus
mgm4816995.3	CR101_27_L001_R1_001	mgs703144	mgl703146	24931	3 days	respiratory tract environment	anatomical structure	mucus
mgm4817112.3	CR17_94_L001_R1_001	mgs702763	mgl702765	24705	3 days	respiratory tract environment	anatomical structure	mucus
mgm4817178.3	CR586_44_L001_R1_001	mgs702760	mgl702762	24703	35 days	respiratory tract environment	anatomical structure	mucus
mgm4817012.3	CR653_46_L001_R1_001	mgs703096	mgl703098	24884	35 days	respiratory tract environment	anatomical structure	mucus
mgm4817193.3	CR121_82_L001_R1_001	mgs703225	mgl703227	25004	3 days	respiratory tract environment	anatomical structure	mucus
mgm4817067.3	CR256_10_L001_R1_001	mgs703024	mgl703026	24832	14 days	respiratory tract environment	anatomical structure	mucus
mgm4817018.3	CR350_82_L001_R1_001	mgs703348	mgl703350	25096	14 days	respiratory tract environment	anatomical structure	mucus
mgm4817104.3	CR371_64_L001_R1_001	mgs703396	mgl703398	25161	14 days	respiratory tract environment	anatomical structure	mucus
mgm4817073.3	CR73_21_L001_R1_001	mgs703066	mgl703068	24854	3 days	respiratory tract environment	anatomical structure	mucus
mgm4817042.3	CR33_7_L001_R1_001	mgs702841	mgl702843	24742	3 days	respiratory tract environment	anatomical structure	mucus
mgm4817051.3	CR703_112_L001_R1_001	mgs703267	mgl703269	25037	35 days	respiratory tract environment	anatomical structure	mucus
mgm4817169.3	CR34_98_L001_R1_001	mgs702850	mgl702852	24744	3 days	respiratory tract environment	anatomical structure	mucus
mgm4817043.3	CR188_105_L001_R1_001	mgs703405	mgl703407	25181	3 days	respiratory tract environment	anatomical structure	mucus
mgm4817007.3	CR596_119_L001_R1_001	mgs702811	mgl702813	24730	35 days	respiratory tract environment	anatomical structure	mucus
mgm4817172.3	CR146_94_L001_R1_001	mgs703306	mgl703308	25067	3 days	respiratory tract environment	anatomical structure	mucus
mgm4817136.3	CR115_47_L001_R1_001	mgs703207	mgl703209	24977	3 days	respiratory tract environment	anatomical structure	mucus
mgm4817170.3	CR247_111_L001_R1_001	mgs702943	mgl702945	24814	14 days	respiratory tract environment	anatomical structure	mucus
mgm4817032.3	CR137_37_L001_R1_001	mgs703288	mgl703290	25047	3 days	respiratory tract environment	anatomical structure	mucus
mgm4817176.3	CR104_121_L001_R1_001	mgs703171	mgl703173	24942	3 days	respiratory tract environment	anatomical structure	mucus
mgm4817120.3	CR106_62_L001_R1_001	mgs703177	mgl703179	24949	3 days	respiratory tract environment	anatomical structure	mucus
mgm4817005.3	CR682_74_L001_R1_001	mgs703204	mgl703206	24962	35 days	respiratory tract environment	anatomical structure	mucus
mgm4816983.3	CR255_74_L001_R1_001	mgs703015	mgl703017	24828	14 days	respiratory tract environment	anatomical structure	mucus
mgm4817094.3	CR41_134_L001_R1_001	mgs702877	mgl702879	24766	3 days	respiratory tract environment	anatomical structure	mucus
mgm4817046.3	CR135_125_L001_R1_001	mgs703270	mgl703272	25045	3 days	respiratory tract environment	anatomical structure	mucus
mgm4816997.3	CR655_116_L001_R1_001	mgs703105	mgl703107	24889	35 days	respiratory tract environment	anatomical structure	mucus
mgm4817106.3	CR103_2_L001_R1_001	mgs703162	mgl703164	24941	3 days	respiratory tract environment	anatomical structure	mucus
mgm4817162.3	CR341_11_L001_R1_001	mgs703324	mgl703326	25074	14 days	respiratory tract environment	anatomical structure	mucus
mgm4817157.3	CR53_68_L001_R1_001	mgs702913	mgl702915	24799	3 days	respiratory tract environment	anatomical structure	mucus
mgm4817139.3	CR294_113_L001_R1_001	mgs703174	mgl703176	24942	14 days	respiratory tract environment	anatomical structure	mucus
mgm4817151.3	CR690_10_L001_R1_001	mgs703222	mgl703224	25001	35 days	respiratory tract environment	anatomical structure	mucus
mgm4817198.3	CR151_41_L001_R1_001	mgs703321	mgl703323	25074	3 days	respiratory tract environment	anatomical structure	mucus
mgm4817100.3	CR636_79_L001_R1_001	mgs703027	mgl703029	24832	35 days	respiratory tract environment	anatomical structure	mucus
mgm4817144.3	CR221_82_L001_R1_001	mgs702826	mgl702828	24739	14 days	respiratory tract environment	anatomical structure	mucus
mgm4817024.3	CR231_61_L001_R1_001	mgs702880	mgl702882	24766	14 days	respiratory tract environment	anatomical structure	mucus
mgm4817114.3	CR252_127_L001_R1_001	mgs702988	mgl702990	24819	14 days	respiratory tract environment	anatomical structure	mucus
mgm4816992.3	CR273_69_L001_R1_001	mgs703093	mgl703095	24884	14 days	respiratory tract environment	anatomical structure	mucus
mgm4816809.3	690_101_L001_R1_001	mgs702553	mgl702555	25001	35 days	intestine environment	anatomical structure	feces
mgm4816810.3	682_11_L001_R1_001	mgs702547	mgl702549	24962	35 days	intestine environment	anatomical structure	feces
mgm4816811.3	588_16_L001_R1_001	mgs702400	mgl702402	24707	35 days	intestine environment	anatomical structure	feces
mgm4816812.3	631_40_L001_R1_001	mgs702469	mgl702471	24818	35 days	intestine environment	anatomical structure	feces
mgm4816813.3	716_80_L001_R1_001	mgs702583	mgl702585	25067	35 days	intestine environment	anatomical structure	feces
mgm4816814.3	635_65_L001_R1_001	mgs702481	mgl702483	24828	35 days	intestine environment	anatomical structure	feces
mgm4816815.3	735_95_L001_R1_001	mgs702610	mgl702612	25107	35 days	intestine environment	anatomical structure	feces
mgm4816816.3	657_64_L001_R1_001	mgs702514	mgl702516	24891	35 days	intestine environment	anatomical structure	feces
mgm4816817.3	593_60_L001_R1_001	mgs702409	mgl702411	24724	35 days	intestine environment	anatomical structure	feces
mgm4816818.3	615_63_L001_R1_001	mgs702439	mgl702441	24776	35 days	intestine environment	anatomical structure	feces
mgm4816819.3	601_26_L001_R1_001	mgs702418	mgl702420	24739	35 days	intestine environment	anatomical structure	feces
mgm4816820.3	659_57_L001_R1_001	mgs702517	mgl702519	24896	35 days	intestine environment	anatomical structure	feces
mgm4816821.3	648_20_L001_R1_001	mgs702502	mgl702504	24867	35 days	intestine environment	anatomical structure	feces
mgm4816823.3	734_45_L001_R1_001	mgs702607	mgl702609	25106	35 days	intestine environment	anatomical structure	feces
mgm4816824.3	731_5_L001_R1_001	mgs702604	mgl702606	25097	35 days	intestine environment	anatomical structure	feces
mgm4816825.3	737_47_L001_R1_001	mgs702613	mgl702615	25110	35 days	intestine environment	anatomical structure	feces
mgm4816826.3	706_1_L001_R1_001	mgs702574	mgl702576	25046	35 days	intestine environment	anatomical structure	feces
mgm4816827.3	607_22_L001_R1_001	mgs702433	mgl702435	24759	35 days	intestine environment	anatomical structure	feces
mgm4816828.3	590_96_L001_R1_001	mgs702403	mgl702405	24713	35 days	intestine environment	anatomical structure	feces
mgm4816829.3	626_92_L001_R1_001	mgs702454	mgl702456	24808	35 days	intestine environment	anatomical structure	feces
mgm4816830.3	633_62_L001_R1_001	mgs702475	mgl702477	24820	35 days	intestine environment	anatomical structure	feces
mgm4816831.3	628_61_L001_R1_001	mgs702460	mgl702462	24815	35 days	intestine environment	anatomical structure	feces
mgm4816832.3	636_76_L001_R1_001	mgs702484	mgl702486	24832	35 days	intestine environment	anatomical structure	feces
mgm4816833.3	693_24_L001_R1_001	mgs702559	mgl702561	25008	35 days	intestine environment	anatomical structure	feces
mgm4816834.3	602_31_L001_R1_001	mgs702421	mgl702423	24740	35 days	intestine environment	anatomical structure	feces
mgm4816835.3	653_68_L001_R1_001	mgs702508	mgl702510	24884	35 days	intestine environment	anatomical structure	feces
mgm4816836.3	641_3_L001_R1_001	mgs702493	mgl702495	24844	35 days	intestine environment	anatomical structure	feces
mgm4816837.3	671_69_L001_R1_001	mgs702526	mgl702528	24931	35 days	intestine environment	anatomical structure	feces
mgm4816838.3	711_35_L001_R1_001	mgs702580	mgl702582	25054	35 days	intestine environment	anatomical structure	feces
mgm4816839.3	611_70_L001_R1_001	mgs702436	mgl702438	24766	35 days	intestine environment	anatomical structure	feces
mgm4816840.3	721_93_L001_R1_001	mgs702589	mgl702591	25074	35 days	intestine environment	anatomical structure	feces
mgm4816841.3	596_29_L001_R1_001	mgs702412	mgl702414	24730	35 days	intestine environment	anatomical structure	feces
mgm4816842.3	679_59_L001_R1_001	mgs702541	mgl702543	24953	35 days	intestine environment	anatomical structure	feces
mgm4816843.3	625_42_L001_R1_001	mgs702451	mgl702453	24806	35 days	intestine environment	anatomical structure	feces
mgm4816844.3	26_103_L001_R1_001	mgs702379	mgl702381	24730	3 days	intestine environment	anatomical structure	feces
mgm4816845.3	603_37_L001_R1_001	mgs702424	mgl702426	24742	35 days	intestine environment	anatomical structure	feces
mgm4816846.3	655_12_L001_R1_001	mgs702511	mgl702513	24889	35 days	intestine environment	anatomical structure	feces
mgm4816847.3	681_19_L001_R1_001	mgs702544	mgl702546	24958	35 days	intestine environment	anatomical structure	feces
mgm4816848.3	599_102_L001_R1_001	mgs702415	mgl702417	24735	35 days	intestine environment	anatomical structure	feces
mgm4816849.3	627_17_L001_R1_001	mgs702457	mgl702459	24814	35 days	intestine environment	anatomical structure	feces
mgm4816850.3	643_85_L001_R1_001	mgs702499	mgl702501	24854	35 days	intestine environment	anatomical structure	feces
mgm4816851.3	652_34_L001_R1_001	mgs702505	mgl702507	24883	35 days	intestine environment	anatomical structure	feces
mgm4816852.3	707_71_L001_R1_001	mgs702577	mgl702579	25047	35 days	intestine environment	anatomical structure	feces
mgm4816853.3	672_99_L001_R1_001	mgs702529	mgl702531	24938	35 days	intestine environment	anatomical structure	feces
mgm4816854.3	676_72_L001_R1_001	mgs702538	mgl702540	24949	35 days	intestine environment	anatomical structure	feces
mgm4816855.3	685_81_L001_R1_001	mgs702550	mgl702552	24977	35 days	intestine environment	anatomical structure	feces
mgm4816856.3	378_75_L001_R1_001	mgs702388	mgl702390	25181	14 days	intestine environment	anatomical structure	feces
mgm4816857.3	673_27_L001_R1_001	mgs702532	mgl702534	24941	35 days	intestine environment	anatomical structure	feces
mgm4816858.3	637_49_L001_R1_001	mgs702487	mgl702489	24837	35 days	intestine environment	anatomical structure	feces
mgm4816859.3	702_44_L001_R1_001	mgs702565	mgl702567	25035	35 days	intestine environment	anatomical structure	feces
mgm4816860.3	727_13_L001_R1_001	mgs702595	mgl702597	25086	35 days	intestine environment	anatomical structure	feces
mgm4816861.3	720_30_L001_R1_001	mgs702586	mgl702588	25072	35 days	intestine environment	anatomical structure	feces
mgm4816862.3	729_78_L001_R1_001	mgs702598	mgl702600	25095	35 days	intestine environment	anatomical structure	feces
mgm4816863.3	755_43_L001_R1_001	mgs702628	mgl702630	25175	35 days	intestine environment	anatomical structure	feces
mgm4816864.3	642_9_L001_R1_001	mgs702496	mgl702498	24853	35 days	intestine environment	anatomical structure	feces
mgm4816865.3	623_82_L001_R1_001	mgs702448	mgl702450	24799	35 days	intestine environment	anatomical structure	feces
mgm4816866.3	632_74_L001_R1_001	mgs702472	mgl702474	24819	35 days	intestine environment	anatomical structure	feces
mgm4816867.3	700_28_L001_R1_001	mgs702562	mgl702564	25025	35 days	intestine environment	anatomical structure	feces
mgm4816868.3	375_6_L001_R1_001	mgs702385	mgl702387	25175	14 days	intestine environment	anatomical structure	feces
mgm4816869.3	751_97_L001_R1_001	mgs702625	mgl702627	25161	35 days	intestine environment	anatomical structure	feces
mgm4816870.3	726_25_L001_R1_001	mgs702592	mgl702594	25085	35 days	intestine environment	anatomical structure	feces
mgm4816871.3	674_98_L001_R1_001	mgs702535	mgl702537	24942	35 days	intestine environment	anatomical structure	feces
mgm4816872.3	758_83_L001_R1_001	mgs702631	mgl702633	25181	35 days	intestine environment	anatomical structure	feces
mgm4816873.3	664_77_L001_R1_001	mgs702520	mgl702522	24906	35 days	intestine environment	anatomical structure	feces
mgm4816874.3	583_66_L001_R1_001	mgs702391	mgl702393	24690	35 days	intestine environment	anatomical structure	feces
mgm4816875.3	705_10_L001_R1_001	mgs702571	mgl702573	25045	35 days	intestine environment	anatomical structure	feces
mgm4816876.3	606_8_L001_R1_001	mgs702430	mgl702432	24749	35 days	intestine environment	anatomical structure	feces
mgm4816877.3	586_73_L001_R1_001	mgs702394	mgl702396	24703	35 days	intestine environment	anatomical structure	feces
mgm4816878.3	591_51_L001_R1_001	mgs702406	mgl702408	24715	35 days	intestine environment	anatomical structure	feces
mgm4816879.3	638_23_L001_R1_001	mgs702490	mgl702492	24841	35 days	intestine environment	anatomical structure	feces
mgm4816880.3	691_21_L001_R1_001	mgs702556	mgl702558	25004	35 days	intestine environment	anatomical structure	feces
mgm4816881.3	703_41_L001_R1_001	mgs702568	mgl702570	25037	35 days	intestine environment	anatomical structure	feces
mgm4816882.3	604_39_L001_R1_001	mgs702427	mgl702429	24744	35 days	intestine environment	anatomical structure	feces
mgm4816883.3	371_54_L001_R1_001	mgs702382	mgl702384	25161	14 days	intestine environment	anatomical structure	feces
mgm4816884.3	620_33_L001_R1_001	mgs702442	mgl702444	24795	35 days	intestine environment	anatomical structure	feces
mgm4816885.3	730_88_L001_R1_001	mgs702601	mgl702603	25096	35 days	intestine environment	anatomical structure	feces
mgm4816886.3	744_18_L001_R1_001	mgs702619	mgl702621	25128	35 days	intestine environment	anatomical structure	feces
mgm4816887.3	630_48_L001_R1_001	mgs702466	mgl702468	24817	35 days	intestine environment	anatomical structure	feces
mgm4816888.3	745_94_L001_R1_001	mgs702622	mgl702624	25141	35 days	intestine environment	anatomical structure	feces
mgm4816889.3	738_67_L001_R1_001	mgs702616	mgl702618	25112	35 days	intestine environment	anatomical structure	feces
mgm4816890.3	667_7_L001_R1_001	mgs702523	mgl702525	24914	35 days	intestine environment	anatomical structure	feces
mgm4816891.3	622_32_L001_R1_001	mgs702445	mgl702447	24798	35 days	intestine environment	anatomical structure	feces
mgm4816892.3	587_56_L001_R1_001	mgs702397	mgl702399	24705	35 days	intestine environment	anatomical structure	feces
mgm4816893.3	629_4_L001_R1_001	mgs702463	mgl702465	24816	35 days	intestine environment	anatomical structure	feces
mgm4817736.3	CF341_5_L001_R1_001	mgs703797	mgl703799	25074	14 days	intestine environment	anatomical structure	feces
mgm4817737.3	CF326_21_L001_R1_001	mgs703812	mgl703814	25046	14 days	intestine environment	anatomical structure	feces
mgm4817738.3	CF349_8_L001_R1_001	mgs703788	mgl703790	25095	14 days	intestine environment	anatomical structure	feces
mgm4817739.3	CF296_7_L001_R1_001	mgs703848	mgl703850	24949	14 days	intestine environment	anatomical structure	feces
mgm4817740.3	CF310_9_L001_R1_001	mgs703833	mgl703835	25001	14 days	intestine environment	anatomical structure	feces
mgm4817741.3	CF327_2_L001_R1_001	mgs703809	mgl703811	25047	14 days	intestine environment	anatomical structure	feces
mgm4817742.3	CF322_6_L001_R1_001	mgs703821	mgl703823	25035	14 days	intestine environment	anatomical structure	feces
mgm4817743.3	CF301_13_L001_R1_001	mgs703842	mgl703844	24958	14 days	intestine environment	anatomical structure	feces
mgm4817744.3	CF311_12_L001_R1_001	mgs703830	mgl703832	25004	14 days	intestine environment	anatomical structure	feces
mgm4817745.3	CF347_20_L001_R1_001	mgs703791	mgl703793	25086	14 days	intestine environment	anatomical structure	feces
mgm4817746.3	CF302_15_L001_R1_001	mgs703839	mgl703841	24962	14 days	intestine environment	anatomical structure	feces
mgm4817747.3	CF320_1_L001_R1_001	mgs703824	mgl703826	25025	14 days	intestine environment	anatomical structure	feces
mgm4817748.3	CF331_4_L001_R1_001	mgs703806	mgl703808	25054	14 days	intestine environment	anatomical structure	feces
mgm4817749.3	CF299_14_L001_R1_001	mgs703845	mgl703847	24953	14 days	intestine environment	anatomical structure	feces
mgm4817750.3	CF323_10_L001_R1_001	mgs703818	mgl703820	25037	14 days	intestine environment	anatomical structure	feces
mgm4817751.3	CF313_16_L001_R1_001	mgs703827	mgl703829	25008	14 days	intestine environment	anatomical structure	feces
mgm4817752.3	CF305_17_L001_R1_001	mgs703836	mgl703838	24977	14 days	intestine environment	anatomical structure	feces
mgm4817753.3	CF346_22_L001_R1_001	mgs703794	mgl703796	25085	14 days	intestine environment	anatomical structure	feces
mgm4817754.3	CF293_23_L001_R1_001	mgs703851	mgl703853	24941	14 days	intestine environment	anatomical structure	feces
mgm4817755.3	CF336_18_L001_R1_001	mgs703803	mgl703805	25067	14 days	intestine environment	anatomical structure	feces
mgm4817756.3	CF340_11_L001_R1_001	mgs703800	mgl703802	25072	14 days	intestine environment	anatomical structure	feces
mgm4817757.3	CF325_19_L001_R1_001	mgs703815	mgl703817	25045	14 days	intestine environment	anatomical structure	feces
